# Supplementary material for: Combining continuous spatial and temporal scales for SGD investigations using UAV-based thermal infrared measurements
Source: Copernicus journal article supplement (doi:10.5194/hess-2018-361), 2018-07-12

# Combining continuous spatial and temporal scales for SGD investigations using UAV-based thermal infrared measurements

Ulf Mallast<sup>1</sup>, Christian Siebert<sup>1</sup>

<sup>1</sup> Helmholtz Centre for Environmental Research -UFZ, T. Lieser Str. 4, Halle 06120, Germany

5 Correspondence to: Ulf Mallast (ulf.mallast@ufz.de)

## Supplement.

Figure S 1: Accuracy plot showing the horizontal and vertical deviation of each frame in relation to the 1<sup>st</sup> frame (master). The deviation was inferred using the distance between the mass centers of two reflectors between the processed frame and the master.

10

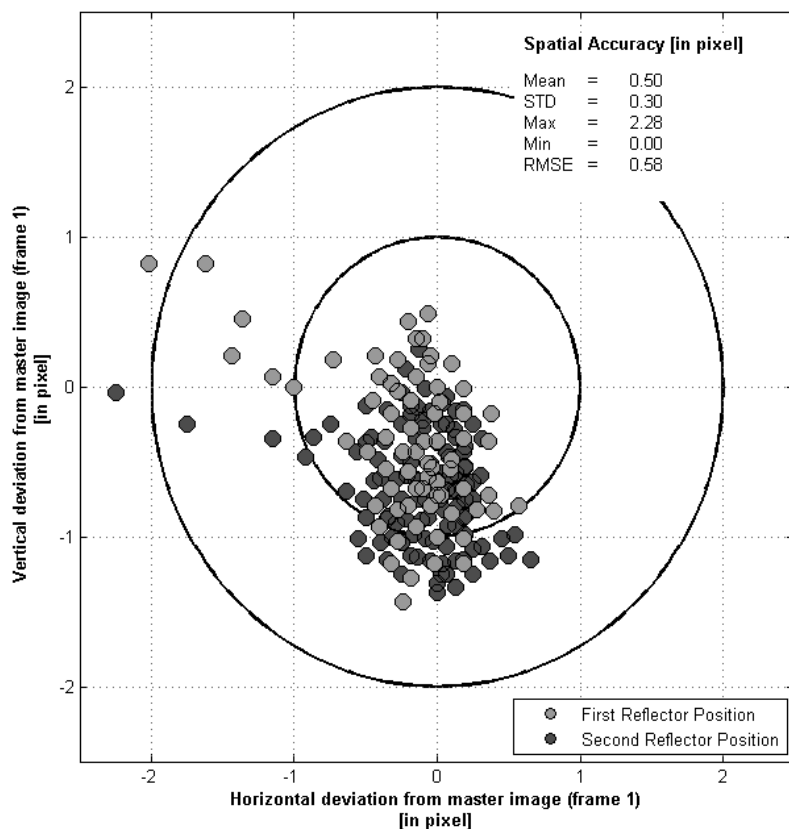

Supplement: Supplementary file 1 [file hess-2018-361-supplement.pdf]
